# Supplementary material for: The bacterial replication origin BUS promotes nucleobase capture
Source: PubMed Central journal article supplement (PMC10721633; doi:10.1038/s41467-023-43823-w), 2023-12-14
Supplement: 41467_2023_43823_MOESM1_ESM.pdf [file 41467_2023_43823_MOESM1_ESM.pdf]

ACTTATCCACA AATCCACA GGCCTACTATTACTTCTACTA  
 TGAATAGGTGTT TAGGTGT CCGG GATGATAATGAAGATGAT  
 Box#6 Box#7 DnaA-trios

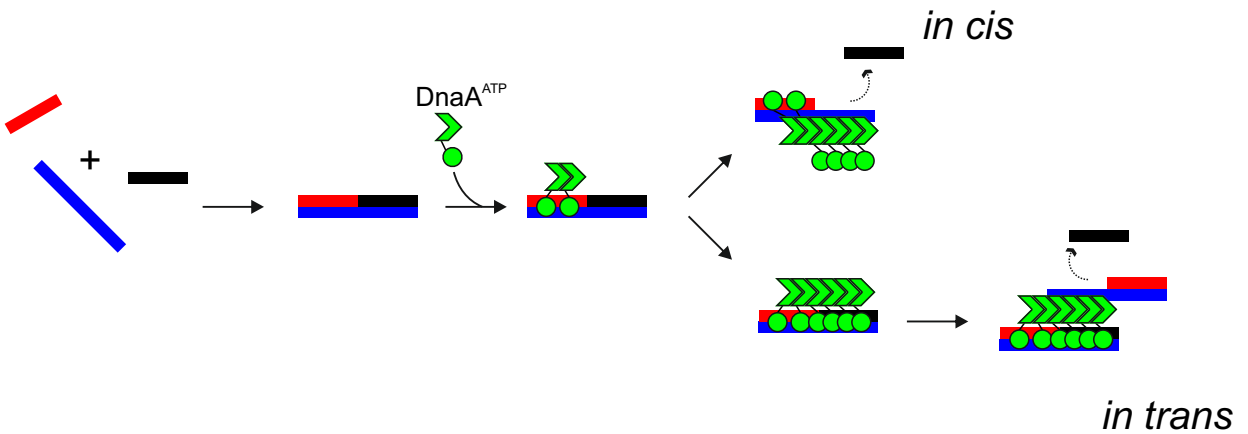

this model requires two DNA scaffolds to contact one another

**Supplementary Figure 1. Alternative models for BUS activity *in vitro*.** DnaA-boxes are required to load DnaA onto DnaA-trios. The DNA scaffolds used to detect DnaA strand separation activity in solution are compatible with two models. In one, DnaA<sup>ATP</sup> is loaded from DnaA-boxes onto adjacent DnaA-trios (*in cis*). In another, an oligomer of DnaA<sup>ATP</sup> is nucleated from DnaA-boxes along the DNA scaffold, binding to the dsDNA using domain IV. This DnaA<sup>ATP</sup> oligomer can subsequently engage the DnaA-trios on a second DNA scaffold, binding to the ssDNA using domain III (*in trans*).

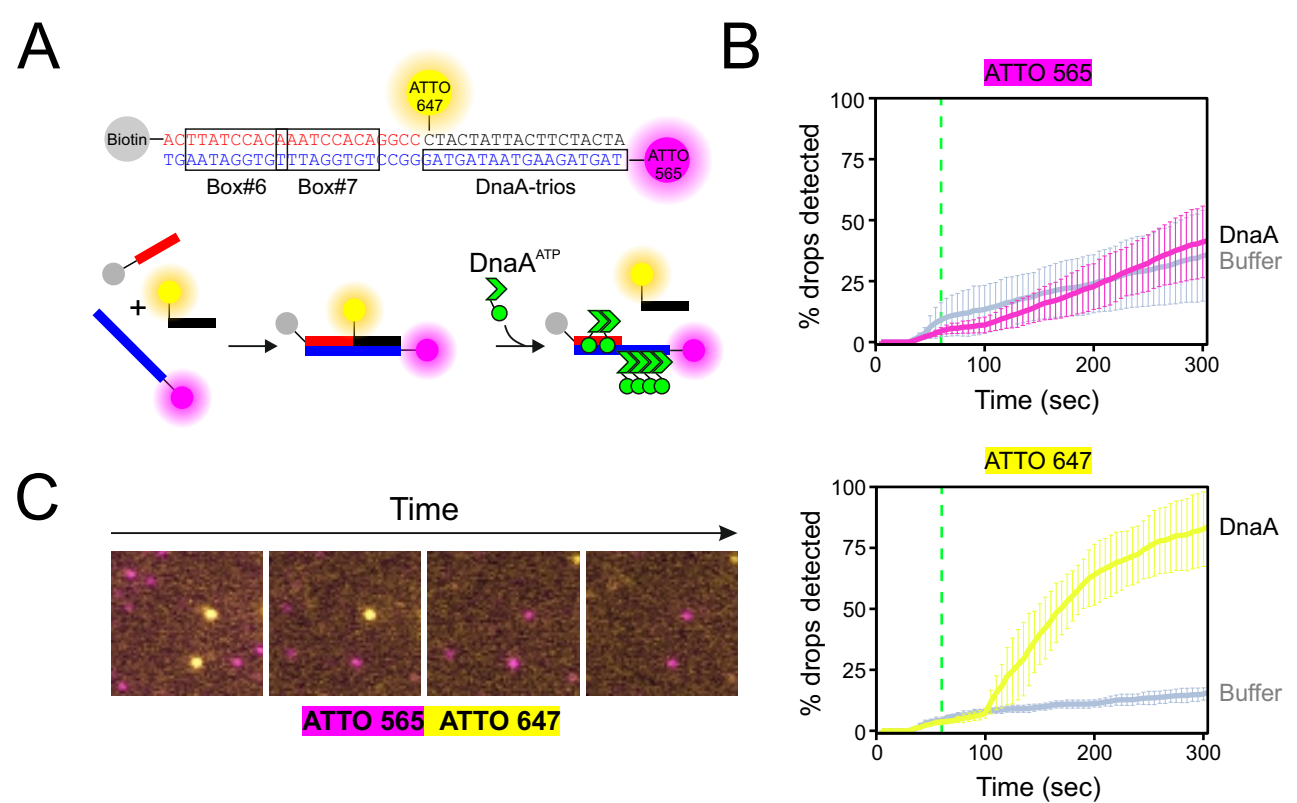

**Supplementary Figure 2. A dual labelled DNA scaffold shows DnaA strand separation is specific. (A)** Experimental design using a DNA scaffold containing two fluorescently labelled oligonucleotides. **(B)** Graph of colocalized fluorescent signals representing the percentage with decreased intensity over time (ATTO<sup>565</sup> pink, ATTO<sup>647</sup> yellow). Data shows the average and percentage standard deviation from three independent experiments (source data are provided as a Source Data file). **(C)** Example showing specific loss of ATTO<sup>647</sup> fluorescence (yellow), indicating a DnaA-dependent strand separation event.

**A**

ACTTATCCACAAATCCACAGGCC

TGAATAGGTGTTTAGGTGTCCGGG<sub>18</sub>A<sub>17</sub>T<sub>16</sub>G<sub>15</sub>A<sub>14</sub>T<sub>13</sub>A<sub>12</sub>A<sub>11</sub>T<sub>10</sub>G<sub>9</sub>A<sub>8</sub>A<sub>7</sub>G<sub>6</sub>A<sub>5</sub>T<sub>4</sub>G<sub>3</sub>A<sub>2</sub>T<sub>1</sub>

Box#6      Box#7      Trios

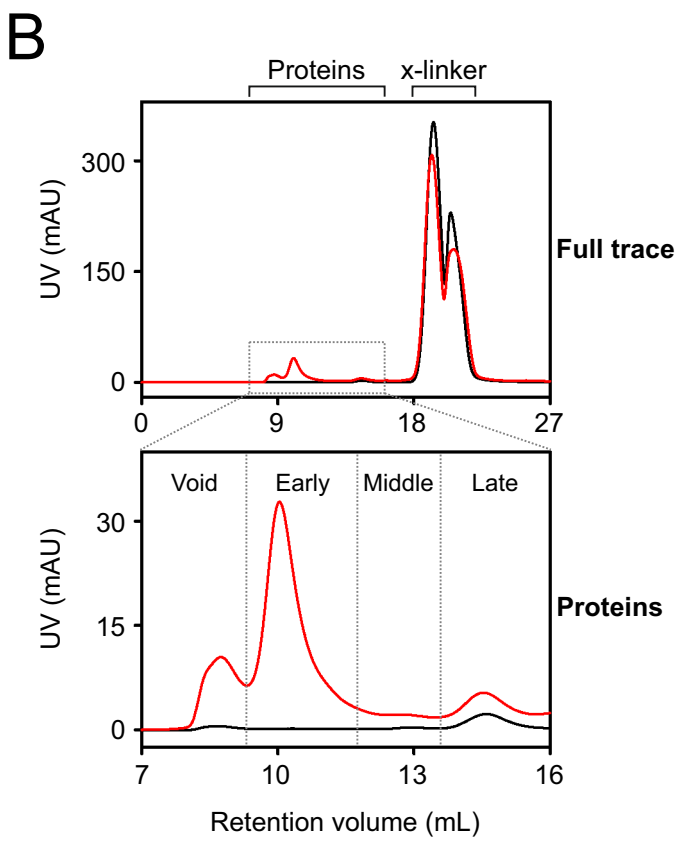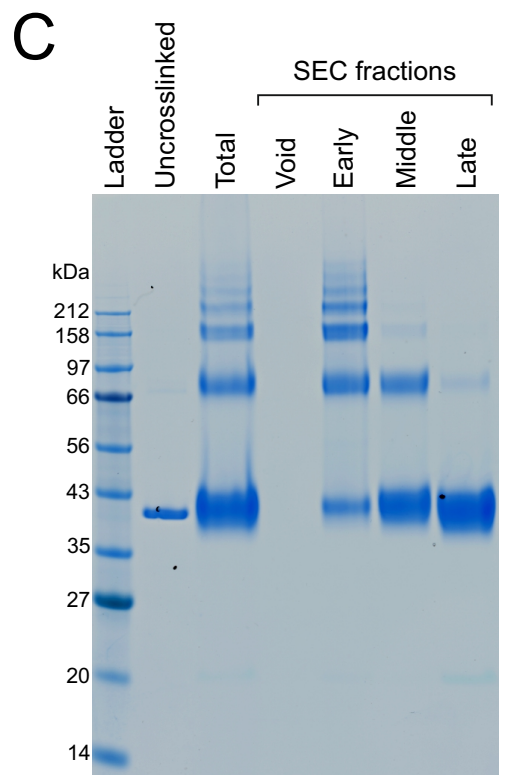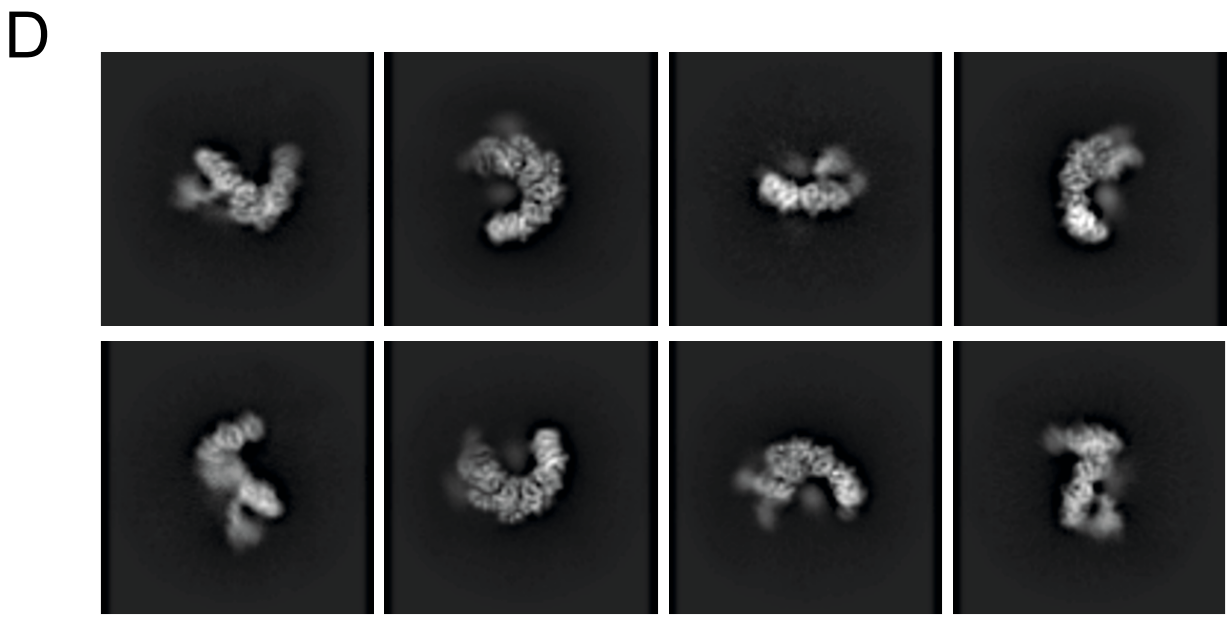

**Supplementary Figure 3. Biochemistry and cryo-EM analysis of the BUS. (A)** The DNA scaffold used for single particle cryo-EM structural studies. **(B)** Size exclusion chromatography to separate the BUS. **(C)** SDS-PAGE gel showing the glutaraldehyde cross-linked sample isolated for cryo-EM. **(D)** Representative 2D class averages of the BUS obtained using CryoSparc v3.1.2<sup>37</sup>.

# Cryo-EM workflow

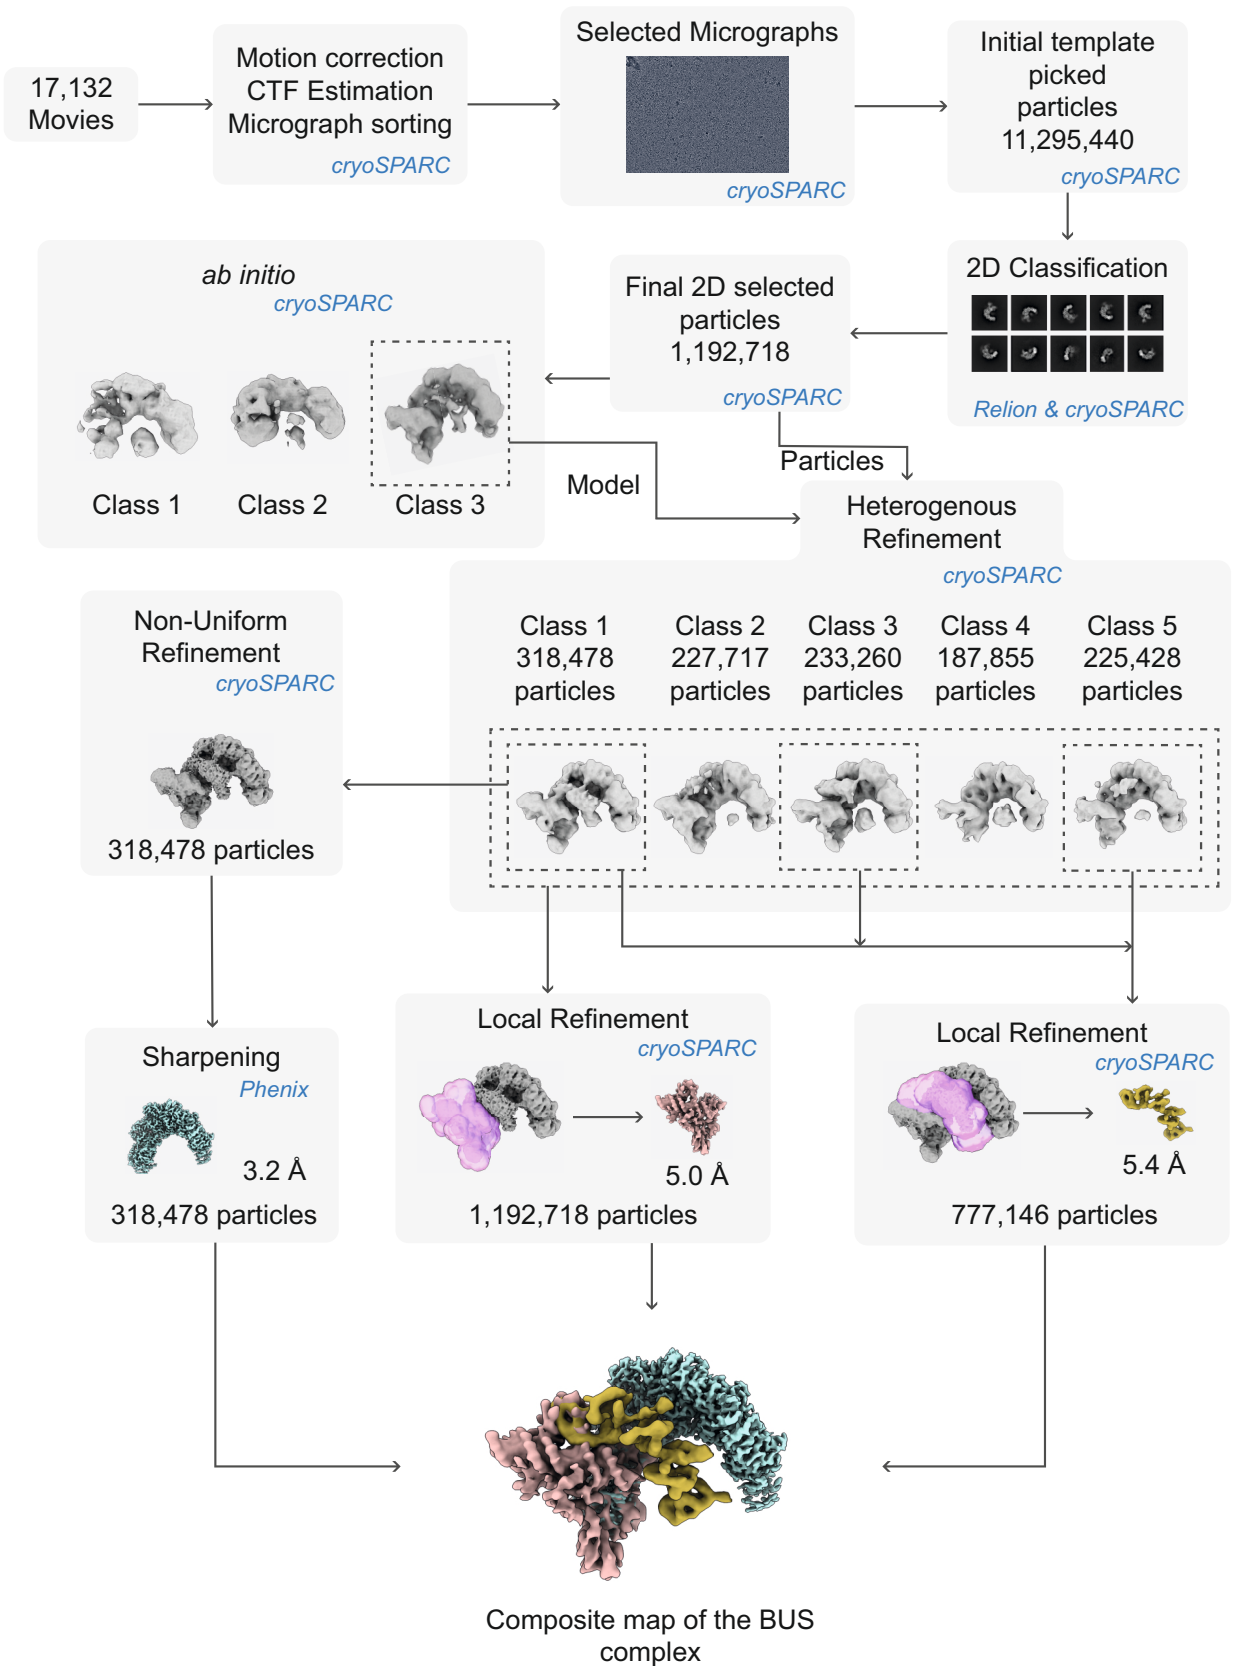

**Supplementary Figure 4. Cryo-EM workflow.** Schematic of the single particle cryo-EM workflow showing the classification, refinement and sharpening steps used to obtain a composite map of the BUS nucleoprotein complex.

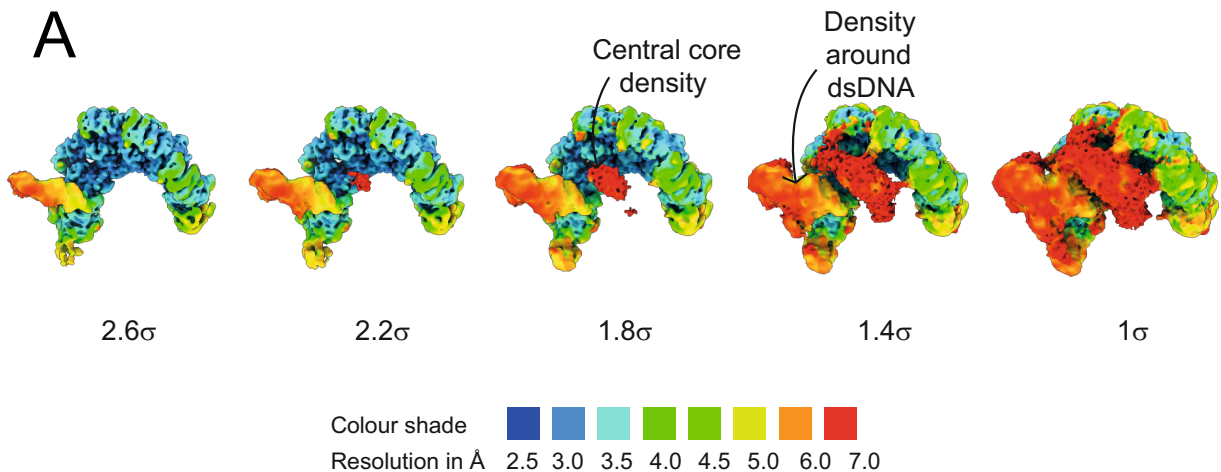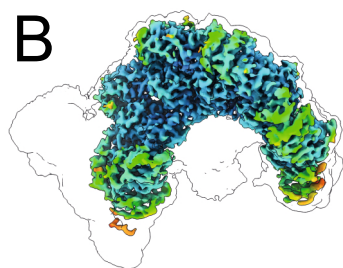

Domain III lattice

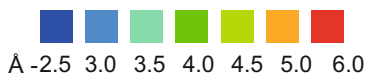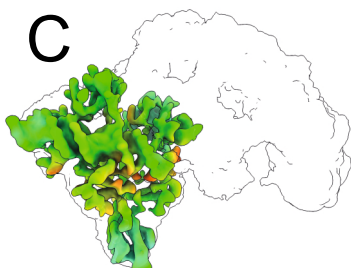

DnaA - dsDNA segment

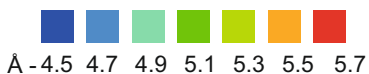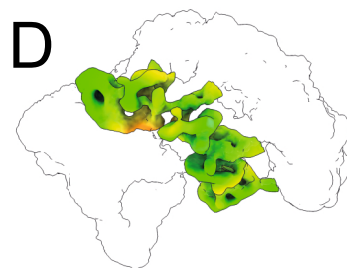

Domain IV lattice

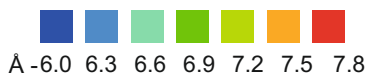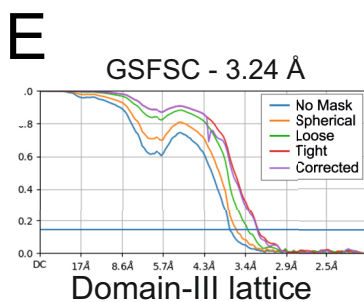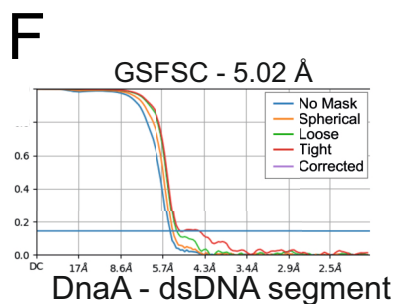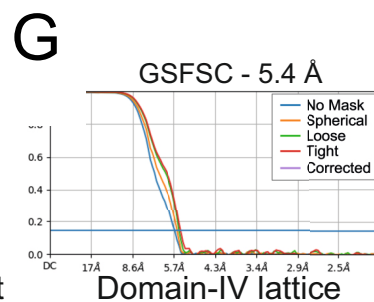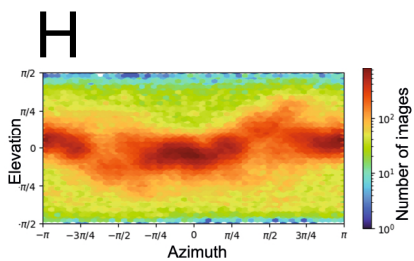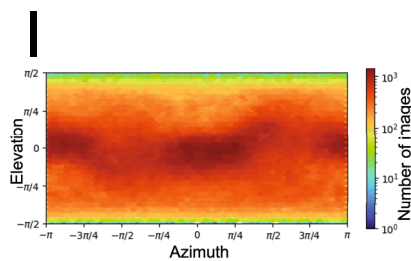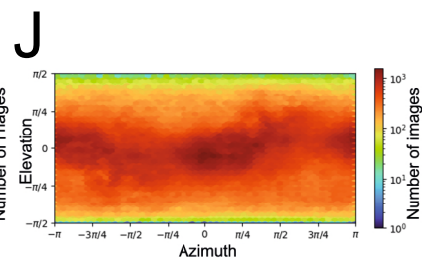

**Supplementary Figure 5. Cryo-EM maps used in this study. (A)** The cryo-EM maps of the BUS coloured by local resolution with each map displayed at different  $\sigma$  levels. Additional density corresponding to the central core and protein binding double stranded DNA can be seen emerging at higher  $\sigma$  levels. **(B)** Cryo-EM map of the domain III lattice coloured by local resolution contoured at  $0.6\sigma$ , overlaid on the overall BUS map contoured at  $0.1\sigma$ . **(C)** Cryo-EM map of the region around the double stranded DNA coloured by local resolution contoured at  $0.27\sigma$ , overlaid on the overall BUS map contoured at  $0.1\sigma$ . **(D)** Cryo-EM map of the domain IV lattice coloured by local resolution contoured at  $0.21\sigma$ , overlaid on the overall BUS map contoured at  $0.1\sigma$ . **(E)** Fourier shell correlation of the cryo-EM map for the domain III lattice showing an average map resolution of 3.2 Å. **(F)** Fourier shell correlation of the cryo-EM map for the region around dsDNA showing an average map resolution of 5.0 Å. **(G)** Fourier shell correlation of cryo-EM map for the domain IV lattice map showing an average map resolution of 5.4 Å. **(H)** Orientation distribution of particles contributing for the cryo-EM map of the domain-III lattice. **(I)** Orientation distribution of particles contributing for the cryo-EM map of the region around dsDNA. **(J)** Orientation distribution of particles contributing for the cryo-EM map of the domain-IV lattice.



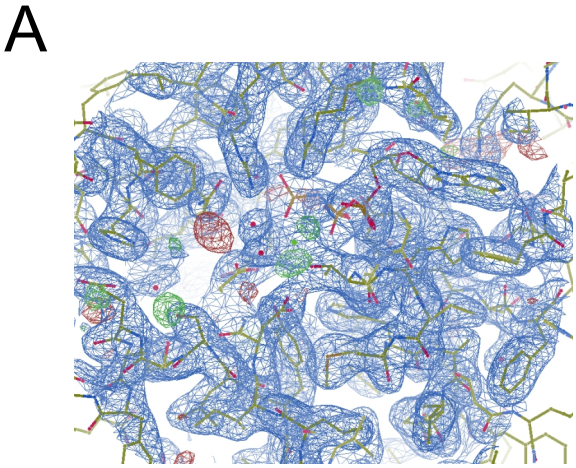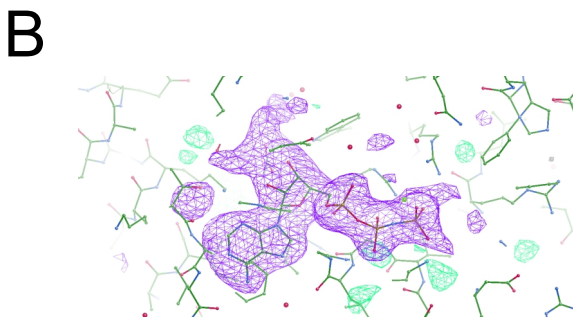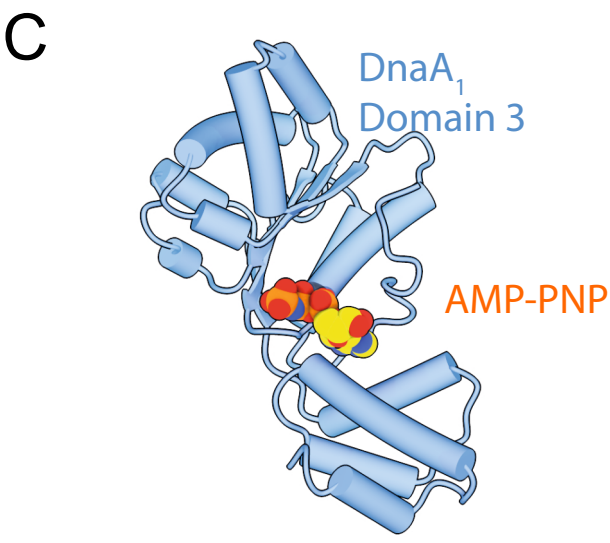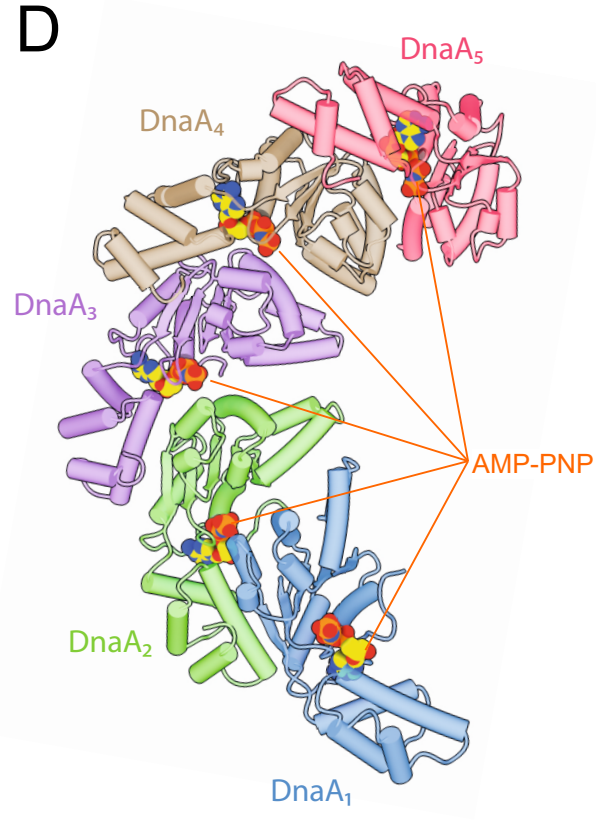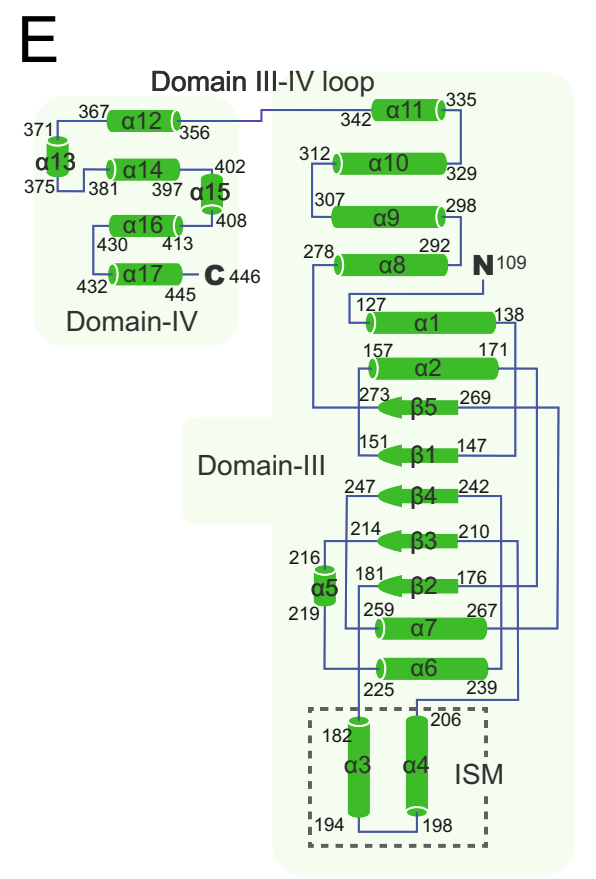

**Supplementary Figure 6. X-ray crystal structure of *B. subtilis* DnaA<sup>106-346</sup> determined at 2.38 Å. (A)** Representative view of the electron density map (contour level is  $1\sigma$ ). **(B)** An omit map of the bound ligand (contour level is  $3\sigma$ ). **(C)** A monomer of DnaA<sup>106-346</sup> (domain III). The AMP-PNP bound to the protein is shown in spacefill. **(D)** In the unit cell, five DnaA monomers are organised in a right-handed helical oligomer. **(E)** A topology diagram of the DnaA domain III and IV showing the respective domains and secondary structure. The ISM is highlighted.

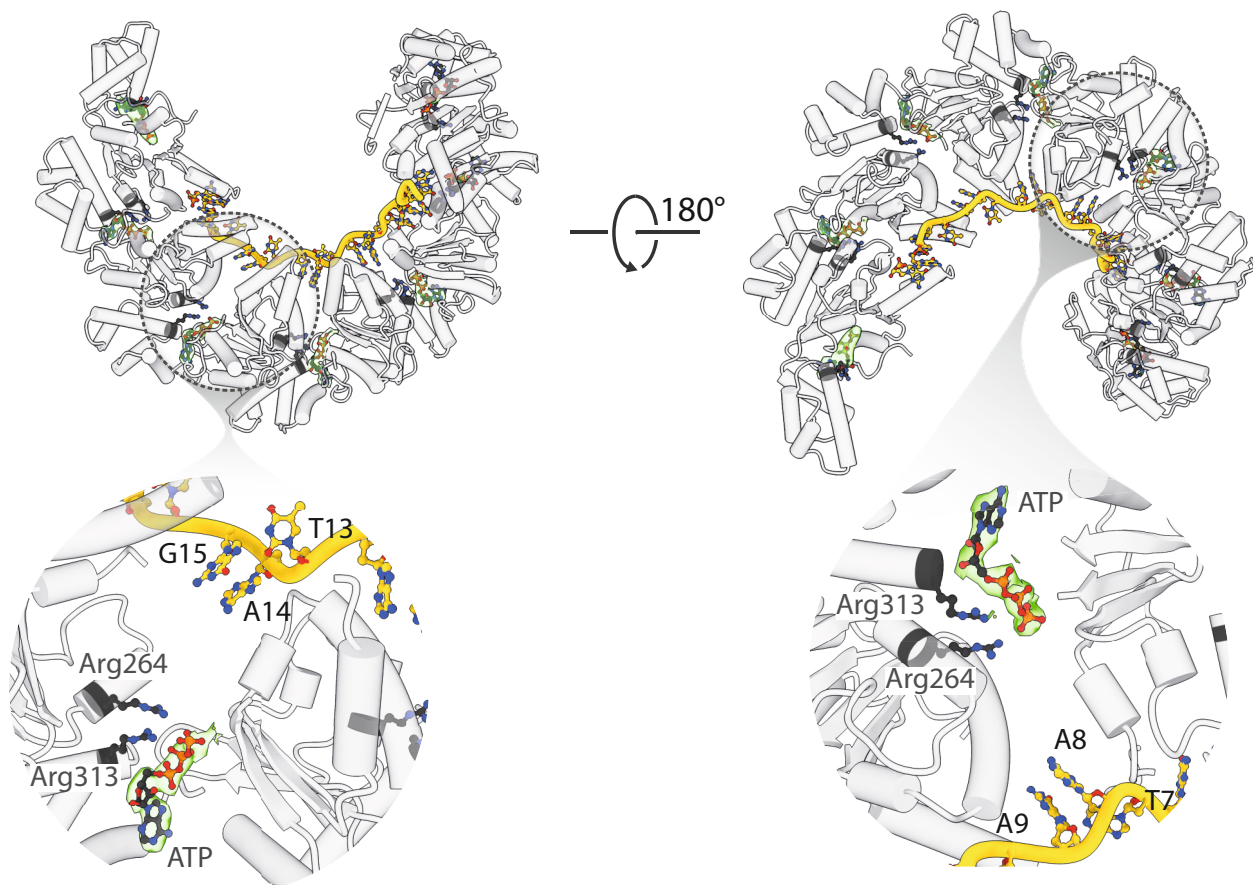

**Supplementary Figure 7. Orientation of the DnaA oligomer on ssDNA.** Model of the BUS complex showing domain III bound to ssDNA of the DNA scaffold. The ssDNA, ATP, and key arginine residues (Arg264 and Arg333) interacting with ATP are highlighted. The left inset shows the ATP (with extracted density contoured at  $0.6\sigma$ ) that is stabilized by Arg264 of DnaA<sub>2</sub> and Arg313 of DnaA<sub>3</sub>. The DnaA-trio composed of T13, A14, and G15 that engages DnaA<sub>2</sub> and DnaA<sub>3</sub> is also shown. The right inset shows the ATP (with density) that is stabilized by Arg264 of DnaA<sub>4</sub> and Arg313 of DnaA<sub>5</sub>. The DnaA-trio composed of T7, A8, and A9 that engages DnaA<sub>4</sub> and DnaA<sub>5</sub> is also shown.

**A**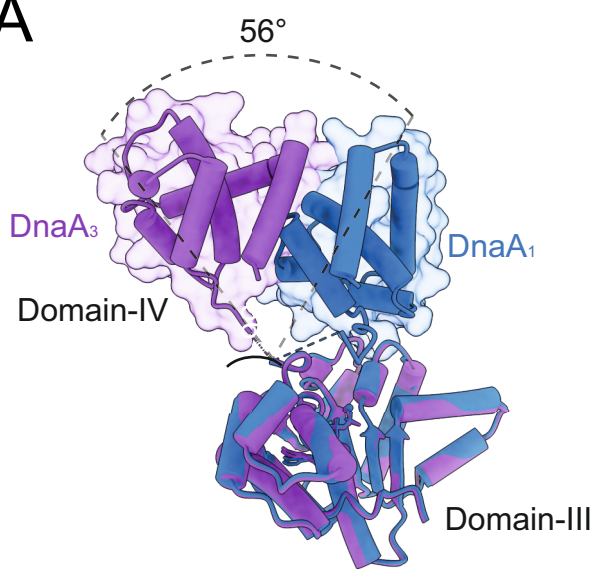**B**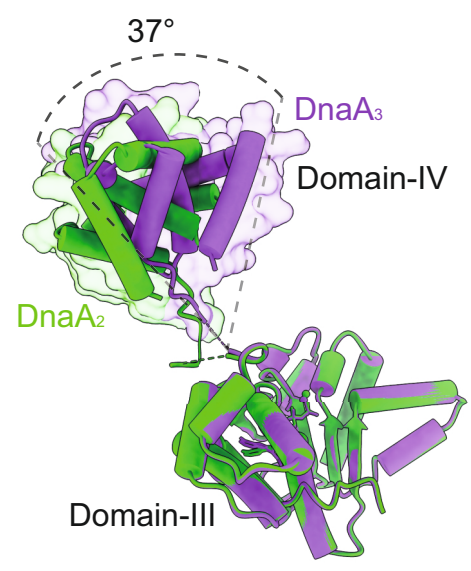

**Supplementary Figure 8. Movement of Domain IV in DnaA proteins bound to DnaA-boxes. (A)** Structural alignment of the DnaA<sub>1</sub> and DnaA<sub>3</sub> showing the domain IV of DnaA<sub>1</sub> and DnaA<sub>3</sub> are 56° apart relative to domain III. **(B)** Structural alignment of the DnaA<sub>2</sub> and DnaA<sub>3</sub> showing the domain IV of DnaA<sub>2</sub> and DnaA<sub>3</sub> are 37° apart while relative to domain III.

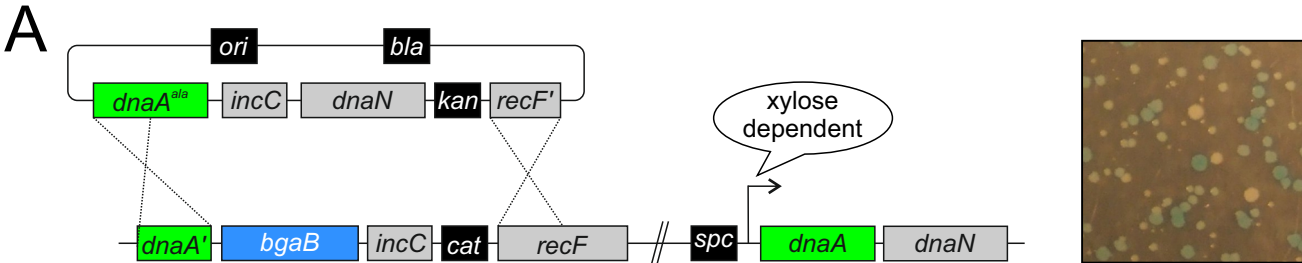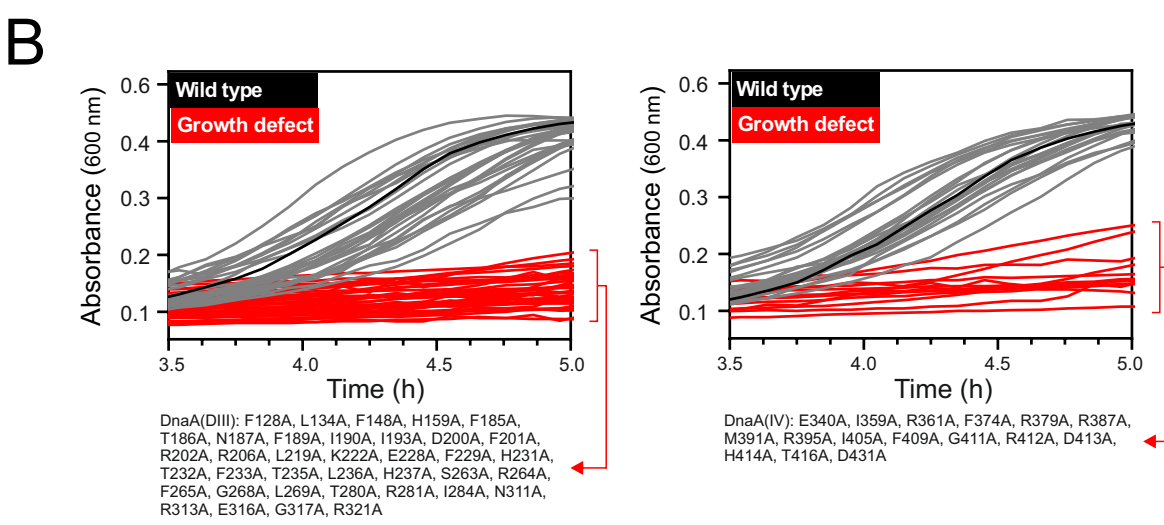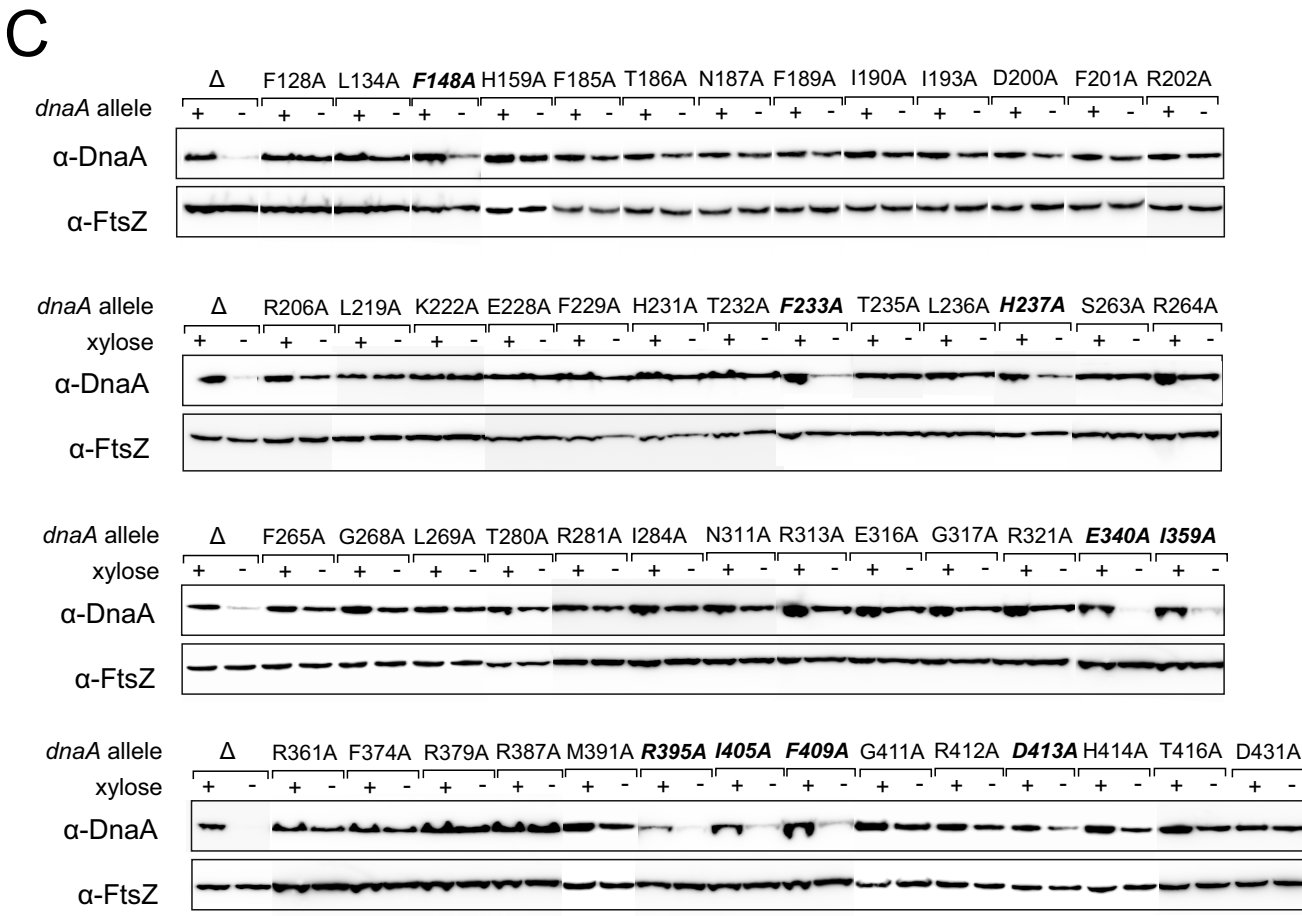

## Supplementary Figure 9. Identification of essential residues in *B. subtilis*

**DnaA. (A)** Method for constructing the *dnaA* alanine substitution library. An integration vector (pCW23) carrying individual *dnaA* substitutions was used for allelic replacement of the native *dnaA* gene (using the recipient strain CW199). Selection of white colonies following transformation of *dnaA* substitutions is performed in the presence of kanamycin, the chromogenic substrate X-gal and xylose (to express DnaA from the ectopic locus). **(B)** Plate reader growth assays of DnaA variants in the absence of xylose. The black line shows the growth profile of cells harbouring wild-type *dnaA*, whereas the lines coloured red show lethal substitutions (lines coloured grey grew similar to wild-type). Lists of the DnaA variants that revealed a lethal phenotype are provided below each panel. The wild-type control is CW380. Strains of the alanine substitution library are listed in Supplementary Table 1. **(C)** Immunoblotting reveals that some lethal alanine substitutions in the endogenous copy of DnaA were not well expressed (italicized and bold). The tubulin homolog FtsZ was used as a standard. The strain lacking *dnaA* at the native locus is FDS257. Multiple images have been spliced together to create the composite panel.

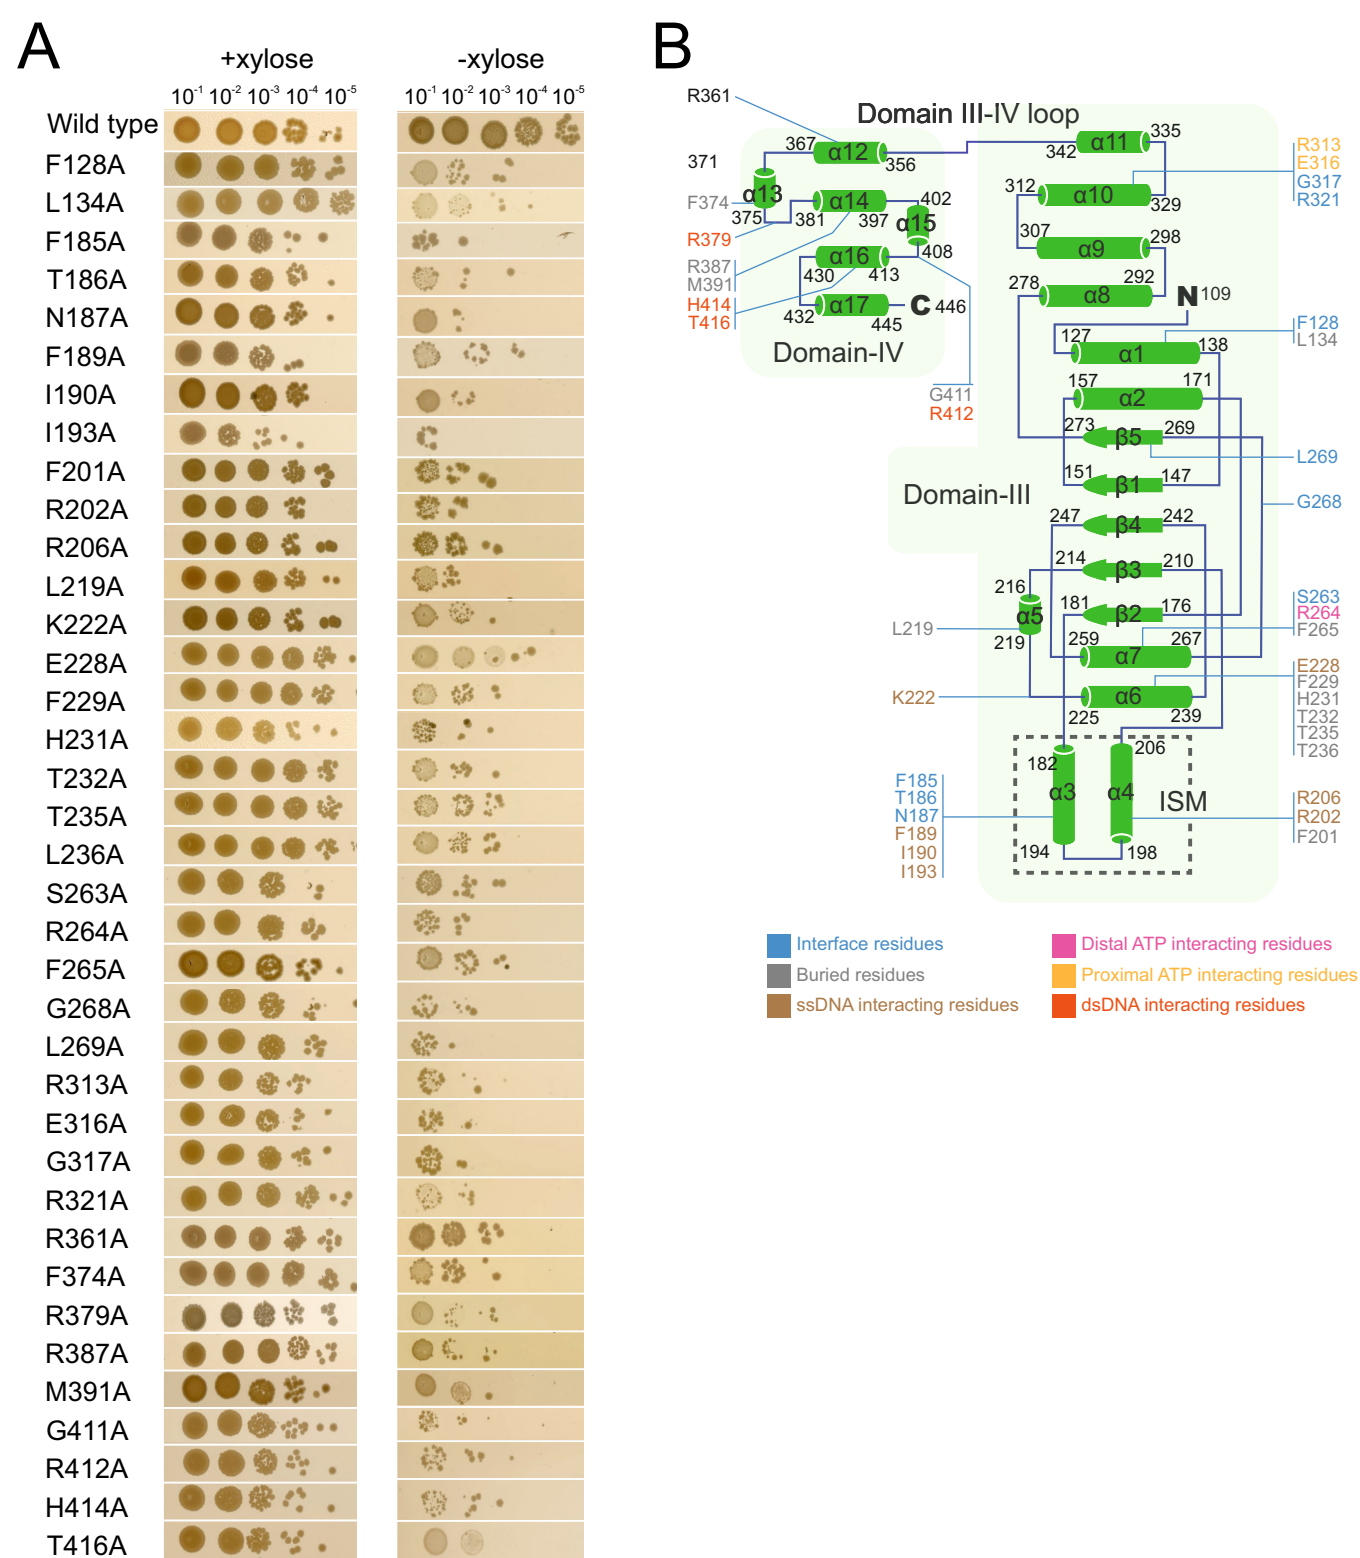

**Supplementary Figure 10. Confirmation and mapping of essential DnaA residues.** (A) Spot titre assays of lethal alanine substitutions that are expressed *in vivo*. The wild-type control is CW233 and the parent strain of all DnaA mutants is CW199. (B) Topology diagram of DnaA protein with the locations of lethal alanine substitutions indicated. The proposed activity of each essential residue is also indicated.

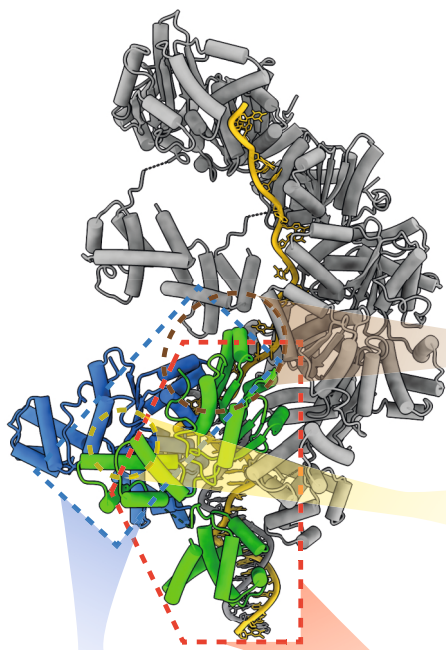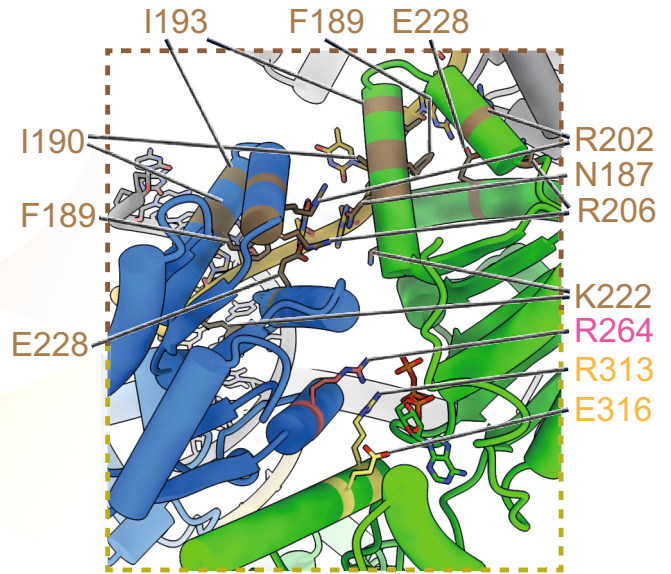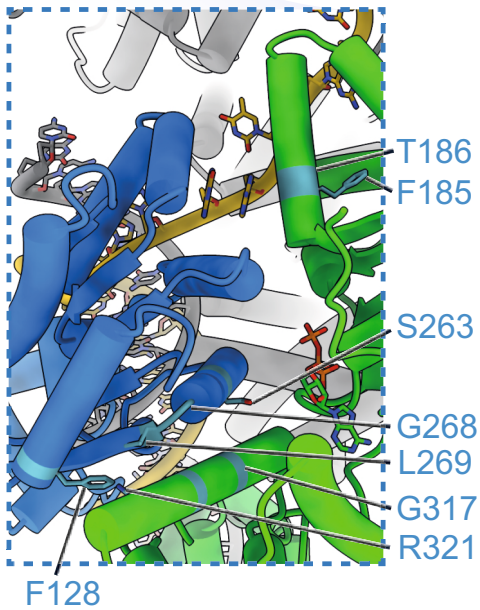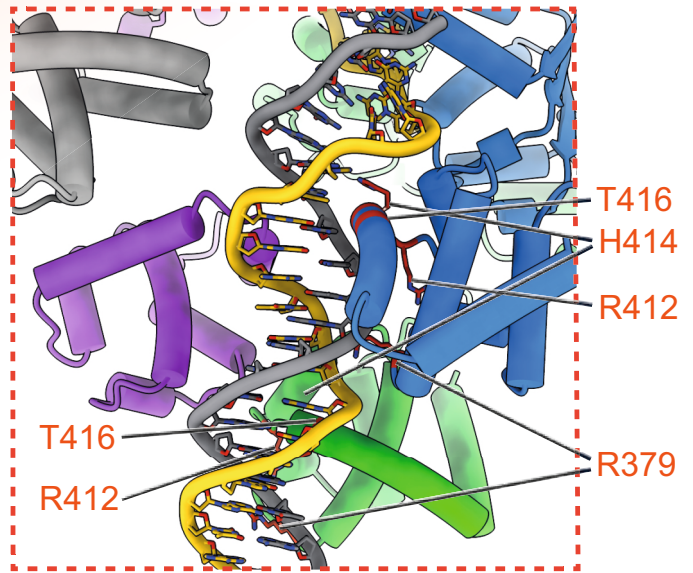

■ Interface

■ Buried

■ ssDNA interacting

■ Distal ATP interacting residues

■ Proximal ATP interacting residues

■ dsDNA interacting residues



**Supplementary Figure 11. Mapping essential residues onto the model of DnaA.**

Top left, the overall BUS complex model shown in grey, with DnaA<sub>1</sub> and DnaA<sub>2</sub> highlighted in blue and green, respectively. Top right inset shows the interface between DnaA<sub>1</sub> and DnaA<sub>2</sub> with the ssDNA interacting residues shown in brown and proximal ATP interacting residues shown in yellow. Bottom left inset show the interface between DnaA<sub>1</sub> and DnaA<sub>2</sub> highlighting key residues required for oligomerisation. Bottom right inset shows the domain IV of DnaA<sub>1</sub>, DnaA<sub>2</sub> and DnaA<sub>3</sub> with the residues involved in dsDNA interaction highlighted in orange.

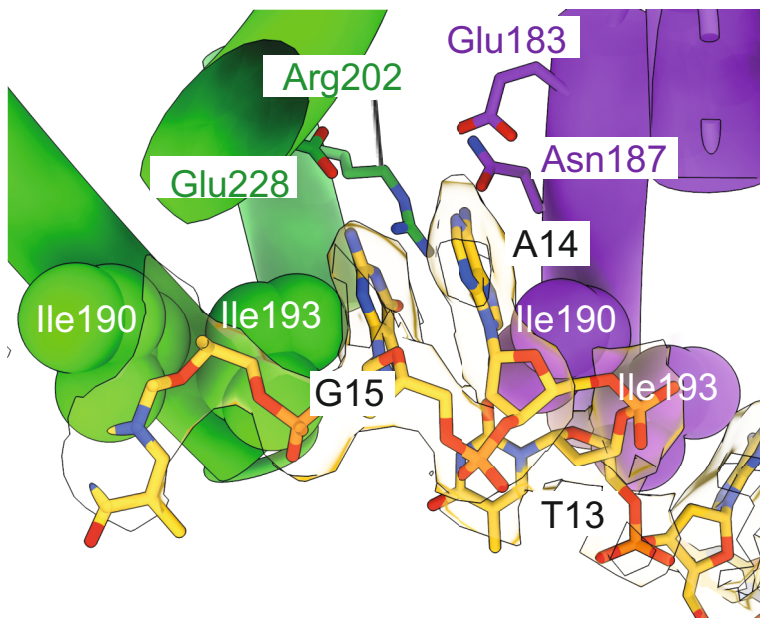

**Supplementary Figure 12. Essential hydrophobic residues flank flipped bases.**

Hydrophobic side chains within the ISM (residues Ile190 and Ile193) are inserted between the two flipped bases (G18, A17) and the non-flipped base (T16). The extracted density around the bases are contoured at  $0.6\sigma$ .

**A**

*Bacillus subtilis*  
*Enterococcus faecium*  
*Staphylococcus aureus*  
*Klebsiella pneumoniae*  
*Acinetobacter baumannii*  
*Pseudomonas aeruginosa*  
*Enterobacter cloacae*

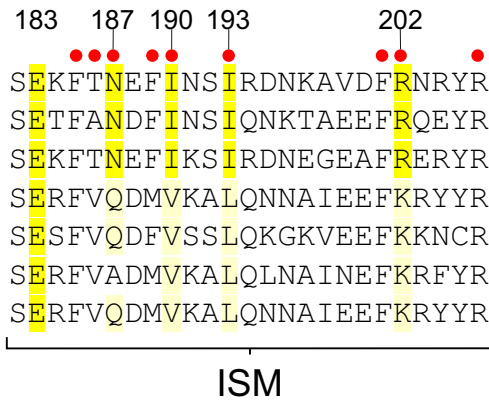**B**

*Bacillus subtilis*  
*Mycobacterium tuberculosis*  
*Escherichia coli*  
*Aquifex aeolicus*  
*Thermotoga maritima*

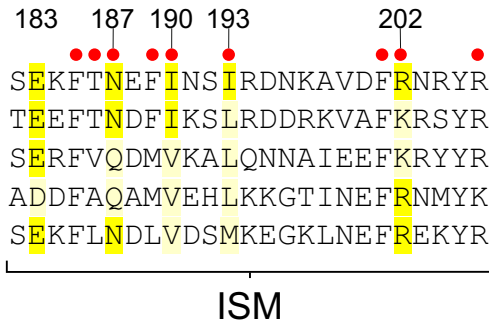

**Supplementary Figure 13. Primary domain organisation and sequence conservation of DnaA proteins.** Alignments of residues around the DnaA ISM involved in binding DnaA-trios (numbering refers to *B. subtilis*). Red dots indicate that alanine substitution in *B. subtilis* is lethal. **(A)** DnaA homologs from the multidrug resistance ESKAPE pathogens. **(B)** DnaA homologs from commonly used model organisms.

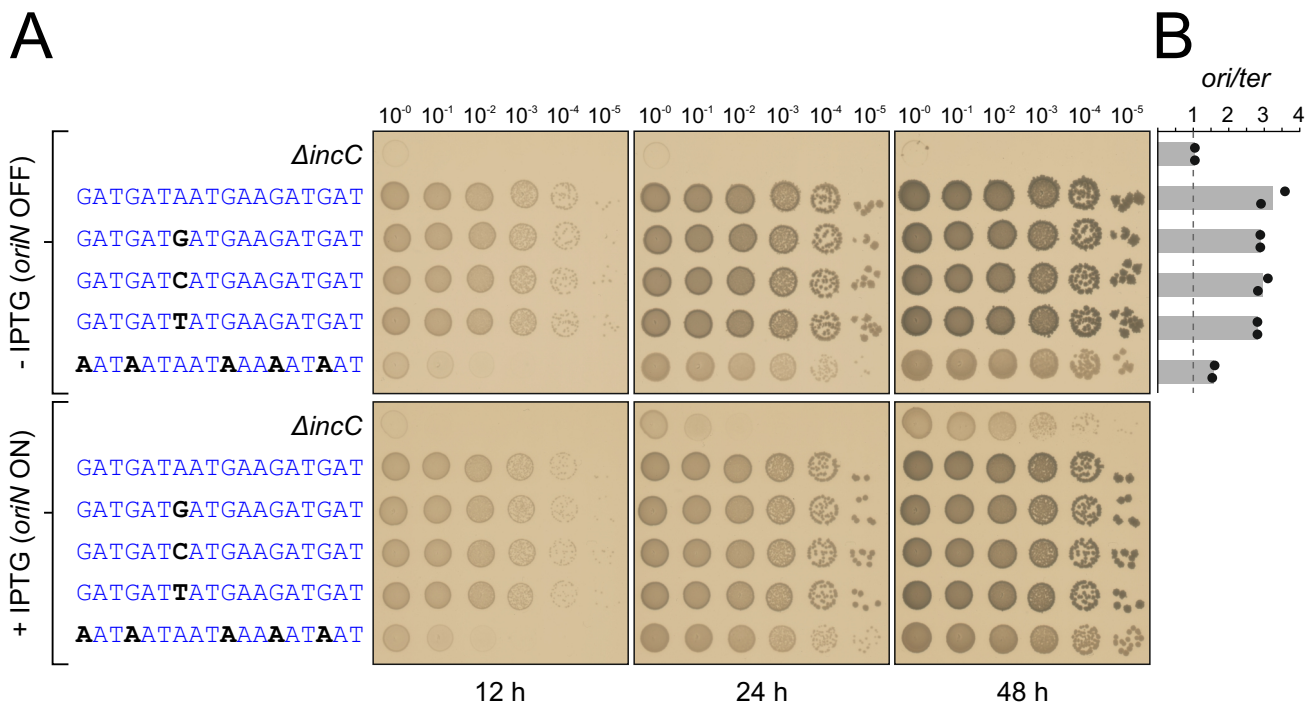

**Supplementary Figure 14. The dinucleotide 3'-GA-5' is preferred to 3'-AA-5' within DnaA-trios.** (A) Spot titre analysis with strains that have replaced DnaA-trio<sub>3</sub> 3'-AAT-5' with either 3'-GAT-5', 3'-CAT-5' or 3'-TAT-5' and a strain harbouring adenine in the first position of each DnaA-trio. The presence or absence of IPTG indicates the induction state of the *repN/oriN* system. Wild-type (FS682), *ΔincC* (FS404), DnaA-trio<sub>3</sub> first position: A→G (FDS1029), A→C (FDS1031), A→T (FDS1035), all DnaA-trios first position A (FDS1037). (B) Marker frequency analysis of strains shown in panel A. Data shows the average and individual data points from two independent experiments (source data are provided as a Source Data file).

Supplementary Table 1.  
X-ray data collection and refinement statistics

|                                                     | DnaA domain III        |
|-----------------------------------------------------|------------------------|
| <b>Data collection</b>                              |                        |
| Space group                                         | P 32                   |
| Cell dimensions                                     |                        |
| <i>a</i> , <i>b</i> , <i>c</i> (Å)                  | 81.58, 81.58, 223.20   |
| $\alpha$ , $\beta$ , $\gamma$ (°)                   | 90, 90, 120            |
| Resolution (Å)                                      | 74.40-2.38 (2.52-2.38) |
| <i>R</i> <sub>merge</sub>                           | 0.18 (1.46)            |
| <i>I</i> / $\sigma I$                               | 10.1 (1.5)             |
| Completeness (%)                                    | 85.3 (27.2)            |
| Redundancy                                          | 9.7 (6.7)              |
| <b>Refinement</b>                                   |                        |
| Resolution (Å)                                      | 74.40-2.38             |
| No. reflections                                     | 54023                  |
| <i>R</i> <sub>work</sub> / <i>R</i> <sub>free</sub> | 0.19/0.24              |
| No. atoms                                           | 9656                   |
| Protein                                             | 9365                   |
| Ligand/ion                                          | 169                    |
| Water                                               | 122                    |
| <i>B</i> -factors                                   |                        |
| Protein                                             | 50.45                  |
| Ligand/ion                                          | 40.03                  |
| Water                                               | 33.96                  |
| R.m.s. deviations                                   |                        |
| Bond lengths (Å)                                    | 0.72                   |
| Bond angles (°)                                     | 0.86                   |

## Supplementary Table 2.

## Cryo-EM data collection, processing, and model refinement statistics

| <b>Data collection and processing</b>               |                               |                     |                              |
|-----------------------------------------------------|-------------------------------|---------------------|------------------------------|
| Microscope                                          | Titan Krios                   |                     |                              |
| No of Movies                                        | 17132                         |                     |                              |
| Camera                                              | K3                            |                     |                              |
| Voltage (kV)                                        | 300                           |                     |                              |
| Electron exposure (e <sup>-</sup> Å <sup>-2</sup> ) | 48.3                          |                     |                              |
| Pixel size (Å)                                      | 1.072                         |                     |                              |
| Defocus range (µm)                                  | -0.7 to -3.0                  |                     |                              |
| Symmetry imposed                                    | C1                            |                     |                              |
|                                                     | <b>Domain III<br/>lattice</b> | <b>dsDNA region</b> | <b>Domain IV<br/>lattice</b> |
| Initial particle images                             | 4,970,535                     | 4,970,535           | 4,970,535                    |
| Final particle images                               | 318,478                       | 1,192,718           | 777,146                      |
| FSC threshold                                       | 0.143                         | 0.143               | 0.143                        |
| Map resolution (Å)                                  | 3.2                           | 5.0                 | 5.4                          |
| Map B factor                                        | -137                          | -200                | -100                         |
| EMDB codes                                          | 16230                         | 16231               | 16256                        |
| <b>Refinement and model validation</b>              |                               |                     |                              |
| Model vs data CC (mask)                             | 0.70                          | 0.49                | 0.62                         |
| Clash score                                         | 19.42                         |                     |                              |
| Molprobrity score                                   | 1.96                          |                     |                              |
| Bond length rmsd (Å)                                | 0.005                         |                     |                              |
| Bond angle rmsd (Å)                                 | 0.925                         |                     |                              |
| Poor rotamers (%)                                   | 0.54                          |                     |                              |
| Ramachandran                                        |                               |                     |                              |
| Favoured (%)                                        | 96.98                         |                     |                              |
| Allowed (%)                                         | 3.02                          |                     |                              |
| Outlier (%)                                         | 0                             |                     |                              |
| PDB code                                            | 8BTG                          |                     |                              |
